# Supplementary material for: High admission rates and heavy inpatient service costs of urban tuberculosis patients in eastern China
Source: BMC Health Serv Res. 2019 Jan 18;19:47. doi: 10.1186/s12913-019-3892-9 (PMC6339337; doi:10.1186/s12913-019-3892-9)
Supplement: Supplementary file 1 — Details of the 356 TB patients. These data contain demographic and social characteristics of the 356 TB patients, including gender, age, occupation, patient category, residence, sputum smear test, hospitalization status, type of health insurance, etc. (XLS 70 kb) [file 12913_2019_3892_MOESM1_ESM.xls]

## Sheet: Sheet1
Details of the 356 TB patients
Patient No.	Gender	Age	Occupation	Patient category	Residence	Sputum smear test	Health Insurance	Admission
1	2	3	3	2	1	2	1	0
2	1	4	3	2	1	2	1	0
3	1	2	2	1	2	2	4	1
4	1	1	2	1	1	1	1	0
5	1	3	2	1	1	2	1	0
6	2	3	2	1	2	1	2	0
7	1	3	3	1	2	1	2	0
8	1	4	2	2	2	1	2	0
9	1	1	3	1	2	1	2	0
10	1	4	3	1	1	2	1	0
11	1	4	3	1	2	2	2	1
12	1	1	3	1	1	1	2	0
13	1	2	2	1	1	2	1	1
14	2	1	2	1	1	1	1	0
15	1	1	2	1	1	1	1	0
16	1	2	3	1	2	1	2	1
17	2	4	2	1	1	1	2	0
18	1	1	1	1	2	2	3	1
19	1	4	2	1	1	2	2	1
20	1	3	2	1	1	1	2	0
21	1	4	2	1	2	1	2	0
22	1	2	2	1	1	2	1	1
23	2	4	2	1	1	1	2	1
24	1	4	3	2	1	2	1	1
25	1	4	3	1	1	1	2	0
26	2	4	3	1	1	2	2	0
27	1	3	3	1	2	2	2	1
28	2	3	2	1	1	1	2	0
29	1	3	3	1	1	2	1	1
30	1	3	2	1	1	1	2	1
31	1	3	2	1	2	2	1	0
32	1	2	2	1	2	2	1	1
33	1	4	2	2	1	2	2	0
34	1	2	2	2	1	2	4	0
35	2	4	3	1	1	1	1	0
36	1	2	3	1	1	2	1	0
37	1	3	2	1	2	1	2	1
38	1	1	2	1	1	2	1	1
39	1	1	1	1	2	2	3	1
40	1	4	3	1	1	2	1	1
41	1	1	3	1	1	2	1	1
42	1	1	3	1	1	1	4	1
43	1	4	3	1	1	1	1	1
44	1	2	2	1	1	1	2	0
45	1	3	2	1	2	2	1	1
46	1	4	2	1	2	1	2	0
47	1	4	1	1	1	2	1	0
48	1	2	2	1	2	2	2	1
49	1	3	2	1	1	2	1	1
50	1	1	3	1	1	1	1	1
51	1	1	1	1	2	1	3	1
52	1	2	3	1	2	1	1	0
53	1	4	3	1	1	1	1	0
54	2	2	2	1	2	1	4	0
55	1	1	3	1	2	2	2	0
56	2	4	3	1	2	1	2	0
57	1	4	2	1	2	1	2	0
58	2	1	3	1	1	1	4	0
59	1	3	3	1	2	2	2	1
60	1	4	2	1	2	2	2	0
61	2	1	1	1	1	1	2	0
62	2	3	2	1	2	1	2	1
63	1	2	2	1	2	2	1	1
64	2	4	2	1	2	1	2	1
65	1	3	2	1	1	2	1	1
66	2	3	3	1	1	1	1	1
67	2	2	3	1	1	1	1	0
68	1	3	2	1	1	2	1	0
69	1	4	3	2	1	2	2	1
70	1	4	3	1	1	2	1	0
71	2	4	2	1	2	1	2	0
72	1	3	3	1	1	2	1	1
73	1	3	3	1	1	2	2	1
74	1	1	2	1	2	1	1	0
75	2	1	2	1	2	1	1	0
76	2	1	2	1	2	1	1	0
77	2	1	1	1	1	2	3	0
78	1	1	2	1	2	1	4	1
79	2	4	3	1	2	1	1	0
80	1	2	2	1	1	2	1	1
81	1	3	2	1	1	2	1	1
82	2	3	4	2	1	2	1	1
83	2	3	1	1	1	1	1	1
84	1	3	2	2	1	2	2	0
85	1	3	2	2	1	2	2	0
86	2	2	2	1	2	1	4	0
87	2	2	3	1	1	1	1	1
88	1	3	2	1	2	1	2	1
89	1	4	2	1	1	1	2	1
90	1	4	3	1	1	1	4	1
91	1	3	4	1	1	2	2	1
92	1	4	2	2	2	1	2	1
93	1	3	3	2	1	2	2	1
94	2	1	1	1	2	2	1	1
95	1	3	2	1	2	1	1	1
96	1	4	2	1	1	1	2	1
97	1	3	4	2	2	2	2	1
98	1	4	3	1	2	2	1	1
99	2	4	3	1	1	2	2	1
100	1	4	3	1	2	2	1	1
101	1	4	3	1	1	1	1	0
102	1	2	2	1	2	1	1	0
103	1	4	3	1	1	2	1	1
104	1	4	3	1	2	2	2	1
105	1	2	4	1	1	2	2	1
106	1	3	3	1	2	1	1	1
107	1	3	4	1	1	1	1	0
108	1	3	2	1	1	2	2	1
109	1	1	2	1	1	1	1	0
110	1	4	3	2	1	2	1	1
111	1	4	2	1	2	1	2	1
112	1	4	2	1	1	1	2	0
113	2	4	2	1	1	2	2	1
114	2	1	2	1	2	1	4	0
115	1	3	2	2	1	2	1	1
116	1	4	2	2	2	2	2	1
117	2	4	3	1	2	1	1	1
118	1	1	1	1	2	1	3	1
119	1	3	4	1	1	2	1	1
120	1	4	3	1	1	2	1	1
121	2	4	3	1	2	2	1	1
122	1	4	2	2	2	2	2	1
123	2	4	3	1	1	2	1	1
124	1	4	4	1	1	1	4	1
125	1	2	3	1	1	1	2	0
126	2	3	2	1	2	2	2	1
127	2	1	2	1	2	2	1	0
128	1	4	2	1	1	2	1	0
129	2	4	3	1	1	2	1	1
130	1	3	2	1	2	1	2	0
131	2	2	3	1	1	1	1	1
132	1	4	3	1	1	2	1	0
133	1	3	2	1	1	2	2	1
134	2	4	3	1	2	2	2	0
135	1	2	3	1	2	2	2	1
136	1	3	2	1	1	2	4	1
137	2	4	2	1	1	2	2	0
138	1	3	3	1	2	1	1	0
139	1	4	3	1	1	1	1	1
140	1	3	2	1	2	2	2	1
141	2	4	3	1	2	1	2	1
142	1	3	2	2	2	2	2	1
143	1	1	2	1	2	1	1	0
144	1	2	2	1	2	1	1	0
145	1	1	3	1	1	1	4	1
146	1	4	3	1	2	1	1	0
147	1	4	2	1	2	1	2	0
148	1	2	3	1	2	1	2	0
149	2	1	1	1	2	2	2	1
150	1	4	3	1	1	1	1	1
151	1	2	4	1	2	2	4	0
152	2	1	1	1	2	1	4	0
153	1	2	3	1	2	1	2	1
154	2	1	1	1	1	2	2	1
155	1	4	3	1	2	1	1	1
156	1	4	3	1	1	1	1	0
157	1	4	3	1	2	2	1	1
158	1	4	3	1	1	2	1	1
159	1	3	2	1	1	1	1	1
160	1	3	3	1	1	2	1	1
161	1	3	3	1	1	1	1	1
162	1	4	1	1	1	2	1	1
163	1	4	2	1	1	1	2	0
164	1	4	3	2	1	1	1	0
165	1	4	2	1	1	1	2	1
166	1	3	3	2	1	2	1	1
167	2	1	1	1	1	1	3	1
168	1	1	4	1	2	1	1	1
169	1	4	2	1	1	1	2	0
170	1	3	2	1	1	2	1	0
171	1	1	1	1	1	2	2	0
172	1	3	2	1	1	2	1	1
173	1	2	2	1	1	2	1	1
174	1	2	3	1	2	1	2	1
175	1	1	3	1	2	1	4	1
176	1	1	1	1	1	2	4	1
177	1	4	3	2	2	2	1	1
178	1	2	2	1	1	2	1	1
179	1	4	3	1	1	2	4	1
180	1	1	1	1	2	1	3	1
181	1	3	2	1	1	1	1	1
182	1	2	4	1	2	1	1	0
183	1	4	3	1	2	1	1	0
184	1	4	2	1	2	1	2	0
185	1	3	4	2	2	2	1	1
186	1	4	3	1	1	1	1	1
187	2	2	3	1	1	1	2	1
188	1	2	1	1	1	1	1	0
189	1	4	2	2	1	2	1	0
190	1	1	3	1	2	1	4	0
191	1	4	3	1	1	2	1	1
192	2	2	2	1	2	1	2	0
193	1	3	4	1	1	1	1	1
194	1	3	3	2	2	2	1	1
195	1	4	2	2	1	2	2	1
196	2	4	3	1	1	1	1	1
197	1	3	3	1	2	1	1	1
198	1	1	1	1	1	1	4	1
199	1	3	4	1	1	1	1	1
200	1	3	2	1	1	2	1	1
201	1	1	2	1	1	1	4	1
202	1	1	2	1	1	2	4	1
203	1	4	3	1	1	1	1	0
204	1	2	3	1	2	1	4	0
205	1	3	3	1	1	2	1	1
206	1	3	2	1	2	1	1	0
207	1	3	2	2	1	2	2	1
208	1	2	2	1	1	2	4	1
209	2	2	3	1	1	2	1	1
210	1	4	3	2	2	1	1	0
211	2	1	1	1	1	1	3	1
212	1	3	2	1	2	1	4	0
213	1	3	2	1	1	1	1	1
214	1	4	2	1	2	1	2	0
215	1	4	3	1	2	2	4	1
216	1	3	2	2	2	1	2	1
217	1	3	2	1	1	2	2	1
218	2	3	4	1	2	2	1	1
219	1	3	1	1	2	1	1	0
220	2	4	2	1	1	1	2	1
221	1	3	3	1	2	1	4	1
222	1	4	3	1	1	2	2	0
223	1	2	2	1	2	2	2	1
224	1	1	4	1	1	1	1	1
225	1	4	3	1	2	1	4	0
226	1	3	3	1	1	2	4	1
227	1	1	3	1	2	2	4	1
228	1	3	2	1	2	1	2	1
229	2	4	3	1	2	1	2	1
230	2	3	2	1	1	1	1	0
231	1	4	2	1	2	2	2	0
232	2	1	1	1	1	2	3	1
233	2	3	2	1	2	1	2	0
234	1	3	2	1	1	2	1	1
235	2	1	1	1	2	1	2	0
236	1	4	3	1	1	2	1	1
237	1	4	3	1	2	1	1	1
238	2	2	2	1	2	2	1	1
239	2	4	2	1	1	1	2	1
240	1	3	1	2	1	2	1	0
241	1	2	2	1	2	1	1	0
242	1	1	1	1	2	1	3	1
243	1	4	2	1	1	2	4	1
244	1	1	3	1	1	1	2	0
245	1	4	2	1	1	2	4	1
246	1	4	3	2	1	2	4	1
247	1	4	2	1	2	2	2	1
248	1	1	1	1	2	1	3	1
249	1	3	3	1	1	2	1	0
250	1	1	3	1	1	2	1	1
251	1	3	3	2	2	2	2	1
252	1	1	1	1	2	1	4	0
253	1	4	3	2	1	2	1	1
254	1	3	2	1	2	2	4	1
255	1	2	3	1	1	1	1	1
256	2	4	2	1	2	2	2	0
257	1	1	2	1	2	1	2	0
258	1	1	1	1	1	1	3	1
259	1	1	4	1	1	1	2	1
260	1	3	4	1	2	2	2	0
261	2	3	3	1	1	1	1	0
262	1	4	2	1	2	1	2	1
263	2	2	1	1	1	2	2	0
264	2	1	3	2	2	2	4	1
265	1	4	3	1	1	1	1	1
266	2	4	2	1	1	1	2	0
267	1	4	3	2	1	2	1	0
268	1	2	4	1	2	2	4	1
269	1	2	3	2	1	2	2	1
270	1	1	2	1	1	1	1	1
271	2	3	2	2	2	1	2	1
272	1	3	1	1	2	2	1	1
273	2	2	3	1	1	1	2	0
274	1	1	3	1	1	1	1	1
275	1	2	4	2	1	2	1	1
276	1	4	3	2	1	2	1	1
277	1	3	2	1	1	1	2	1
278	1	3	2	1	1	2	2	1
279	1	4	2	2	1	2	2	1
280	2	4	3	1	1	2	1	1
281	1	4	2	2	2	2	2	1
282	2	3	2	2	2	1	2	1
283	1	3	2	1	2	1	1	1
284	1	1	3	1	2	1	1	0
285	1	3	2	1	1	1	2	0
286	1	4	3	1	1	1	1	0
287	1	4	3	1	1	2	4	1
288	1	3	3	1	1	1	1	0
289	1	1	1	1	1	2	4	1
290	1	3	3	2	2	2	2	1
291	1	4	2	1	1	2	2	1
292	1	1	2	1	2	1	1	0
293	2	3	4	1	2	1	1	0
294	1	4	3	1	2	1	2	1
295	1	1	2	1	1	1	1	0
296	1	4	3	1	1	2	2	0
297	2	1	1	1	1	1	4	1
298	1	4	3	1	1	1	1	0
299	2	4	2	1	2	1	2	1
300	1	3	2	1	1	1	2	1
301	1	4	3	1	2	1	1	0
302	1	4	3	1	1	1	1	1
303	1	1	3	1	2	1	2	0
304	1	1	2	1	2	2	1	1
305	2	3	3	2	1	2	1	1
306	1	4	3	1	2	1	1	1
307	1	4	2	1	1	2	2	1
308	1	1	2	1	1	2	2	1
309	1	4	2	2	1	2	2	0
310	1	4	3	1	1	1	2	1
311	2	4	3	1	2	1	1	1
312	1	3	3	1	1	2	4	1
313	1	3	3	1	2	1	4	1
314	1	3	2	1	2	1	4	0
315	2	1	2	1	1	2	4	1
316	1	4	3	1	2	2	2	1
317	2	3	2	2	2	2	4	1
318	1	4	3	1	1	1	1	0
319	1	4	2	2	2	1	2	1
320	1	4	2	1	2	1	1	1
321	2	2	3	1	1	1	1	0
322	1	4	2	2	1	2	2	1
323	1	4	3	2	2	2	1	1
324	1	4	2	2	2	2	2	1
325	2	4	3	1	1	1	1	1
326	2	2	2	1	1	1	1	0
327	2	4	3	1	1	2	1	1
328	2	3	2	1	2	1	2	0
329	1	4	2	1	1	2	2	1
330	1	4	3	1	1	2	1	1
331	1	3	3	1	1	1	1	0
332	1	1	4	1	2	1	1	0
333	2	4	3	1	1	1	1	0
334	1	1	1	1	2	1	3	1
335	1	4	3	1	1	2	1	1
336	2	4	2	2	1	2	2	0
337	2	1	1	1	2	1	2	0
338	1	4	3	1	1	1	2	0
339	2	4	3	1	1	2	4	1
340	1	2	3	1	2	2	2	1
341	2	1	3	1	2	2	4	1
342	1	4	2	1	1	2	2	1
343	1	4	2	2	2	1	2	1
344	1	3	3	1	1	1	1	1
345	1	4	2	1	2	1	2	1
346	1	4	2	1	1	1	2	1
347	2	2	2	1	2	1	2	0
348	1	3	4	1	1	1	1	1
349	1	3	3	1	2	2	1	1
350	1	3	2	1	1	1	1	1
351	1	1	2	1	1	1	1	0
352	2	4	3	1	1	1	1	0
353	1	4	2	1	2	1	2	1
354	2	4	2	1	1	2	2	0
355	1	4	2	2	1	2	2	1
356	1	3	2	1	1	1	1	0
	Male:1	<30:1	Mental labourer:1	New cases:1	Native:1	Negative:1	UEBMI:1	Inpatient：1
	Female:2	30~44:2	Manual labourer:2	Relapsed cases:2	Migration:2	Positive:2	URBMI:2	Outpatient：0
		45~59:3	Retire:3				Student:3
		60~:4	Unknown:4				Without insurance:4
