# Supplementary material for: High admission rates and heavy inpatient service costs of urban tuberculosis patients in eastern China
Source: BMC Health Serv Res. 2019 Jan 18;19:47. doi: 10.1186/s12913-019-3892-9 (PMC6339337; doi:10.1186/s12913-019-3892-9)
Supplement: Supplementary file 2 — Details of the 221 TB inpatients. These data contain the hospitalization records of 221 inpatients, including hospitalization times, length of hospital stay, and type of health insurance. (XLS 48 kb) [file 12913_2019_3892_MOESM2_ESM.xls]

## Sheet: Sheet1
Details of the 221 TB inpatients
Patient No.	Times of hospitalization	Length of Stay (day)	Health Insurance	Gender	Age	Occupation	Patient category	Residence	Sputum smear test
1	1	27	4	1	2	2	1	2	2
2	1	23	2	1	4	3	1	2	2
3	1	27	1	1	2	2	1	1	2
4	1	25	2	1	2	3	1	2	1
5	1	63	3	1	1	1	1	2	2
6	1	24	2	1	4	2	1	1	2
7	2	42	1	1	2	2	1	1	2
8	1	25	2	2	4	2	1	1	1
9	1	16	1	1	4	3	2	1	2
10	2	2	2	1	3	3	1	2	2
11	2	45	1	1	3	3	1	1	2
12	1	41	2	1	3	2	1	1	1
13	1	20	1	1	2	2	1	2	2
14	1	33	2	1	3	2	1	2	1
15	1	32	1	1	1	2	1	1	2
16	1	37	3	1	1	1	1	2	2
17	1	28	1	1	4	3	1	1	2
18	1	80	1	1	1	3	1	1	2
19	1	20	4	1	1	3	1	1	1
20	1	24	1	1	4	3	1	1	1
21	1	29	1	1	3	2	1	2	2
22	1	92	2	1	2	2	1	2	2
23	2	26	1	1	3	2	1	1	2
24	1	35	1	1	1	3	1	1	1
25	1	22	3	1	1	1	1	2	1
26	1	28	2	1	3	3	1	2	2
27	1	25	2	2	3	2	1	2	1
28	1	41	1	1	2	2	1	2	2
29	1	25	2	2	4	2	1	2	1
30	1	61	1	1	3	2	1	1	2
31	1	19	1	2	3	3	1	1	1
32	1	13	2	1	4	3	2	1	2
33	1	63	1	1	3	3	1	1	2
34	1	24	2	1	3	3	1	1	2
35	1	12	4	1	1	2	1	2	1
36	1	28	1	1	2	2	1	1	2
37	3	39	1	1	3	2	1	1	2
38	1	20	1	2	3	4	2	1	2
39	1	15	1	2	3	1	1	1	1
40	1	33	1	2	2	3	1	1	1
41	1	32	2	1	3	2	1	2	1
42	1	38	2	1	4	2	1	1	1
43	1	28	4	1	4	3	1	1	1
44	1	53	2	1	3	4	1	1	2
45	1	20	2	1	4	2	2	2	1
46	1	13	2	1	3	3	2	1	2
47	1	63	1	2	1	1	1	2	2
48	2	28	1	1	3	2	1	2	1
49	1	26	2	1	4	2	1	1	1
50	1	171	2	1	3	4	2	2	2
51	1	26	1	1	4	3	1	2	2
52	1	22	2	2	4	3	1	1	2
53	1	14	1	1	4	3	1	2	2
54	1	20	1	1	4	3	1	1	2
55	2	20	2	1	4	3	1	2	2
56	1	24	2	1	2	4	1	1	2
57	1	25	1	1	3	3	1	2	1
58	1	30	2	1	3	2	1	1	2
59	1	22	1	1	4	3	2	1	2
60	1	26	2	1	4	2	1	2	1
61	1	27	2	2	4	2	1	1	2
62	1	20	1	1	3	2	2	1	2
63	1	30	2	1	4	2	2	2	2
64	1	25	1	2	4	3	1	2	1
65	1	13	3	1	1	1	1	2	1
66	1	23	1	1	3	4	1	1	2
67	2	20	1	1	4	3	1	1	2
68	1	34	1	2	4	3	1	2	2
69	1	17	2	1	4	2	2	2	2
70	2	22	1	2	4	3	1	1	2
71	1	29	4	1	4	4	1	1	1
72	1	27	2	2	3	2	1	2	2
73	1	55	1	2	4	3	1	1	2
74	1	44	1	2	2	3	1	1	1
75	1	24	2	1	3	2	1	1	2
76	1	10	2	1	2	3	1	2	2
77	1	22	4	1	3	2	1	1	2
78	1	23	1	1	4	3	1	1	1
79	1	27	2	1	3	2	1	2	2
80	1	52	2	2	4	3	1	2	1
81	1	41	2	1	3	2	2	2	2
82	1	31	4	1	1	3	1	1	1
83	1	57	2	2	1	1	1	2	2
84	1	21	1	1	4	3	1	1	1
85	1	20	2	1	2	3	1	2	1
86	1	123	2	2	1	1	1	1	2
87	3	23	1	1	4	3	1	2	1
88	1	31	1	1	4	3	1	2	2
89	1	32	1	1	4	3	1	1	2
90	2	29	1	1	3	2	1	1	1
91	1	36	1	1	3	3	1	1	2
92	1	28	1	1	3	3	1	1	1
93	6	3	1	1	4	1	1	1	2
94	1	16	2	1	4	2	1	1	1
95	2	12	1	1	3	3	2	1	2
96	2	10	3	2	1	1	1	1	1
97	1	44	1	1	1	4	1	2	1
98	1	33	1	1	3	2	1	1	2
99	1	65	1	1	2	2	1	1	2
100	1	11	2	1	2	3	1	2	1
101	1	37	4	1	1	3	1	2	1
102	1	18	4	1	1	1	1	1	2
103	1	77	1	1	4	3	2	2	2
104	2	25	1	1	2	2	1	1	2
105	1	73	4	1	4	3	1	1	2
106	1	16	3	1	1	1	1	2	1
107	1	27	1	1	3	2	1	1	1
108	2	92	1	1	3	4	2	2	2
109	1	17	1	1	4	3	1	1	1
110	1	29	2	2	2	3	1	1	1
111	3	3	1	1	4	3	1	1	2
112	2	12	1	1	3	4	1	1	1
113	1	38	1	1	3	3	2	2	2
114	1	29	2	1	4	2	2	1	2
115	5	3	1	2	4	3	1	1	1
116	1	34	1	1	3	3	1	2	1
117	1	60	4	1	1	1	1	1	1
118	2	30	1	1	3	4	1	1	1
119	1	22	1	1	3	2	1	1	2
120	1	4	4	1	1	2	1	1	1
121	1	53	4	1	1	2	1	1	2
122	1	5	1	1	3	3	1	1	2
123	1	63	2	1	3	2	2	1	2
124	1	24	4	1	2	2	1	1	2
125	2	23	1	2	2	3	1	1	2
126	2	3	3	2	1	1	1	1	1
127	1	9	1	1	3	2	1	1	1
128	1	49	4	1	4	3	1	2	2
129	1	10	2	1	3	2	2	2	1
130	1	59	2	1	3	2	1	1	2
131	1	20	1	2	3	4	1	2	2
132	1	12	2	2	4	2	1	1	1
133	1	11	4	1	3	3	1	2	1
134	2	24	2	1	2	2	1	2	2
135	1	26	1	1	1	4	1	1	1
136	1	110	4	1	3	3	1	1	2
137	2	22	4	1	1	3	1	2	2
138	1	21	2	1	3	2	1	2	1
139	1	11	2	2	4	3	1	2	1
140	3	49	3	2	1	1	1	1	2
141	2	9	1	1	3	2	1	1	2
142	2	27	1	1	4	3	1	1	2
143	1	23	1	1	4	3	1	2	1
144	1	31	1	2	2	2	1	2	2
145	1	30	2	2	4	2	1	1	1
146	1	25	3	1	1	1	1	2	1
147	1	102	4	1	4	2	1	1	2
148	1	17	4	1	4	2	1	1	2
149	1	29	4	1	4	3	2	1	2
150	1	30	2	1	4	2	1	2	2
151	1	10	3	1	1	1	1	2	1
152	1	24	1	1	1	3	1	1	2
153	2	21	2	1	3	3	2	2	2
154	1	6	1	1	4	3	2	1	2
155	2	35	4	1	3	2	1	2	2
156	1	11	1	1	2	3	1	1	1
157	2	34	3	1	1	1	1	1	1
158	1	31	2	1	1	4	1	1	1
159	1	21	2	1	4	2	1	2	1
160	1	59	4	2	1	3	2	2	2
161	1	23	1	1	4	3	1	1	1
162	1	61	4	1	2	4	1	2	2
163	2	15	2	1	2	3	2	1	2
164	1	26	1	1	1	2	1	1	1
165	1	18	2	2	3	2	2	2	1
166	1	21	1	1	3	1	1	2	2
167	2	49	1	1	1	3	1	1	1
168	2	121	1	1	2	4	2	1	2
169	3	27	1	1	4	3	2	1	2
170	1	32	2	1	3	2	1	1	1
171	1	26	2	1	3	2	1	1	2
172	1	17	2	1	4	2	2	1	2
173	1	15	1	2	4	3	1	1	2
174	2	21	2	1	4	2	2	2	2
175	1	38	2	2	3	2	2	2	1
176	2	3	1	1	3	2	1	2	1
177	1	77	4	1	4	3	1	1	2
178	1	67	4	1	1	1	1	1	2
179	1	36	2	1	3	3	2	2	2
180	1	23	2	1	4	2	1	1	2
181	1	49	2	1	4	3	1	2	1
182	1	19	4	2	1	1	1	1	1
183	1	15	2	2	4	2	1	2	1
184	1	24	2	1	3	2	1	1	1
185	1	20	1	1	4	3	1	1	1
186	1	22	1	1	1	2	1	2	2
187	3	5	1	2	3	3	2	1	2
188	1	14	1	1	4	3	1	2	1
189	2	16	2	1	4	2	1	1	2
190	1	32	2	1	1	2	1	1	2
191	1	20	2	1	4	3	1	1	1
192	1	21	1	2	4	3	1	2	1
193	1	65	4	1	3	3	1	1	2
194	1	29	4	1	3	3	1	2	1
195	1	12	4	2	1	2	1	1	2
196	1	9	2	1	4	3	1	2	2
197	1	18	4	2	3	2	2	2	2
198	2	21	2	1	4	2	2	2	1
199	1	23	1	1	4	2	1	2	1
200	1	8	2	1	4	2	2	1	2
201	2	33	1	1	4	3	2	2	2
202	1	51	2	1	4	2	2	2	2
203	2	14	1	2	4	3	1	1	1
204	1	15	1	2	4	3	1	1	2
205	1	28	2	1	4	2	1	1	2
206	1	28	1	1	4	3	1	1	2
207	1	21	3	1	1	1	1	2	1
208	1	28	1	1	4	3	1	1	2
209	1	58	4	2	4	3	1	1	2
210	1	20	2	1	2	3	1	2	2
211	1	36	4	2	1	3	1	2	2
212	2	1	2	1	4	2	1	1	2
213	3	33	2	1	4	2	2	2	1
214	2	12	1	1	3	3	1	1	1
215	1	18	2	1	4	2	1	2	1
216	1	21	2	1	4	2	1	1	1
217	1	28	1	1	3	4	1	1	1
218	1	5	1	1	3	3	1	2	2
219	1	26	1	1	3	2	1	1	1
220	1	16	2	1	4	2	1	2	1
221	1	20	2	1	4	2	2	1	2
			UEBMI:1	Male:1	<30:1	Mental labourer:1	New cases:1	Native:1	Negative:1
			URBMI:2	Female:2	30~44:2	Manual labourer:2	Relapsed cases:2	Migration:2	Positive:2
			Student:3		45~59:3	Retire:3
			Without insurance:4		60~:4	Unknown:4
