# Supplementary material for: High admission rates and heavy inpatient service costs of urban tuberculosis patients in eastern China
Source: BMC Health Serv Res. 2019 Jan 18;19:47. doi: 10.1186/s12913-019-3892-9 (PMC6339337; doi:10.1186/s12913-019-3892-9)
Supplement: Supplementary file 3 — Medical expenditure of the 141 inpatients. These data contain the social characteristics and hospitalization expenditures of 141 TB inpatients, including total costs and OOP costs. (XLS 44 kb) [file 12913_2019_3892_MOESM3_ESM.xls]

## Sheet: Sheet1
Medical expenditure of the 141 inpatients
Patient No.	Health Insurance	Gender	Age	Occupation	Patient category	Residence	Sputum smear test	Costs in service package(CNY)	OOP in service package(CNY)	Costs out of service package(CNY)	OOP out of service package(CNY)	Total costs(CNY)	Total OOP(CNY)
1	1	1	1	2	1	1	2	7938.81	1587.76	6478.41	2739.06	14417.2	4326.82
2	1	1	1	3	1	1	1	8000	1600	10729.6	3003.65	18729.6	4603.65
3	3	1	1	1	1	2	1	4134.75	826.95	4048.27	1738.12	8183.02	2565.07
4	3	1	1	1	1	2	1	4147.24	829.45	1055.88	438.64	5203.12	1268.09
5	2	2	1	1	1	2	2	8000	1600	15686.9	8488.62	23686.9	10088.6
6	3	2	1	1	1	1	1	7731.34	1546.27	1903.49	781.53	9634.83	2327.8
7	3	1	1	1	1	2	1	6227.5	1245.5	520.52	215.9	6748.02	1461.4
8	3	2	1	1	1	1	1	7503.03	1500.61	3788.99	1559.64	11292	3060.25
9	1	1	1	4	1	1	1	7705.56	1541.11	2994.47	1731.26	10700	3272.37
10	3	2	1	1	1	1	2	8000	1600	9354.29	1997.56	17354.3	3597.56
11	3	1	1	1	1	2	1	7752.49	1550.5	2783.71	1226.2	10536.2	2776.7
12	3	1	1	1	1	2	1	4821.12	964.22	1501.59	594.6	6322.71	1558.82
13	1	1	1	3	1	1	2	7226.5	1445.3	2501.13	725.93	9727.63	2171.23
14	3	1	1	1	1	1	1	12457.8	1600	3497.59	1300.91	15955.4	2900.91
15	2	1	1	4	1	1	1	8000	1600	5498.11	3154.34	13498.1	4754.34
16	1	1	1	2	1	1	1	7979.84	1595.97	3873.73	1606.1	11853.6	3202.07
17	1	1	1	2	1	2	2	7842.92	1568.58	14550.3	5224.74	22393.2	6793.32
18	2	1	1	2	1	1	2	7138.95	1427.79	4447.89	2532.33	11586.8	3960.12
19	3	1	1	1	1	2	1	6900.82	1380.16	3900	1656.26	10800.8	3036.42
20	1	1	2	2	1	1	2	7389.4	1477.88	3349.99	1293.71	10739.4	2771.59
21	2	1	2	3	1	2	1	5563.15	1112.63	3442.96	1886.27	9006.11	2998.9
22	1	1	2	2	1	1	2	9473.26	1600	1602.48	671.07	11075.7	2271.07
23	1	1	2	2	1	2	2	4775.13	955.03	5103	2287.66	9878.13	3242.69
24	1	1	2	2	1	2	2	7600	1520	9032.44	4607.24	16632.4	6127.24
25	1	1	2	2	1	1	2	14049	1600	1779.73	1128.36	15828.7	2728.36
26	1	2	2	3	1	1	1	8984.21	1600	4365.53	1948.55	13349.7	3548.55
27	2	1	2	4	1	1	2	7169.72	1433.94	4915.34	2798.37	12085.1	4232.31
28	1	2	2	3	1	1	1	7696.63	1539.33	11292.2	4096.62	18988.8	5635.95
29	2	1	2	3	1	2	1	5204.58	1040.92	1459	869.38	6663.58	1910.3
30	1	1	2	2	1	1	2	7387.11	1477.42	3384.15	1337.73	10771.3	2815.15
31	2	2	2	3	1	1	1	4252.05	561.64	8930.79	1179.65	13182.8	1741.29
32	1	2	2	3	1	1	2	8000	1600	3357.23	2481.73	11357.2	4081.73
33	2	1	2	2	1	2	2	7449.71	1357.45	3360.82	612.39	10810.5	1969.84
34	1	2	2	2	1	2	2	6054.74	1210.95	5020.93	1274.11	11075.7	2485.06
35	2	1	2	3	1	2	2	7097.51	1419.5	3060.52	1733.83	10158	3153.33
36	1	1	3	3	1	1	2	7797.53	1559.51	19355.8	6003.65	27153.3	7563.16
37	2	1	3	2	1	1	1	11495.3	1600	6185.38	3147.57	17680.7	4747.57
38	2	1	3	2	1	2	1	6904.81	1380.96	6400.06	3581.04	13304.9	4962
39	1	1	3	2	1	2	2	6340.32	1159.86	9366.75	1713.5	15707.1	2873.36
40	1	1	3	2	1	1	2	7800	1560	12939.6	4537	20739.6	6097
41	2	1	3	3	1	2	2	3170.75	467.58	11239.6	1657.47	14410.4	2125.05
42	2	2	3	2	1	2	1	7146.16	1429.23	3819.53	2174.89	10965.7	3604.12
43	1	1	3	2	1	1	2	7128.6	1425.72	29476.2	7796.24	36604.8	9221.96
44	1	2	3	3	1	1	1	5010.82	1002.16	0	0	5010.82	1002.16
45	2	1	3	3	1	1	2	10023.7	1293.87	886	114.37	10909.7	1408.24
46	1	1	3	2	1	1	2	7815.6	1563.12	11626.4	4310.71	19442	5873.83
47	1	2	3	4	2	1	2	6621.44	1324.29	2140.55	627.71	8761.99	1952
48	2	1	3	2	1	2	1	7718.45	1543.69	7291.01	3981.72	15009.5	5525.41
49	2	1	3	3	2	1	2	5292.09	626.9	1813.49	214.83	7105.58	841.73
50	1	1	3	2	1	2	1	7165.67	1433.13	5161.13	2089.89	12326.8	3523.02
51	1	1	3	3	1	2	1	7864.71	1572.94	4697.66	1242.09	12562.4	2815.03
52	2	1	3	2	1	1	2	8000	1600	11429.3	5924.13	19429.3	7524.13
53	1	1	3	4	1	1	2	7295.57	1459.11	4221.5	2499.61	11517.1	3958.72
54	2	2	3	2	1	2	2	5234.09	1046.82	6796.49	3951	12030.6	4997.82
55	2	1	3	2	1	1	2	9952.57	1600	4565.96	2500.41	14518.5	4100.41
56	2	1	3	2	1	2	2	7934.65	1586.93	3651.01	1990.03	11585.7	3576.96
57	1	1	3	2	1	1	1	8002.08	1600	3964.2	1829.43	11966.3	3429.43
58	1	1	3	3	1	1	2	7800	1393.2	11507.8	2055.47	19307.8	3448.67
59	1	1	3	3	1	1	1	7834.86	1566.97	4127.52	1971.43	11962.4	3538.4
60	1	1	3	2	1	1	2	7802.82	1560.56	8333.7	2643.45	16136.5	4204.01
61	1	1	3	4	1	1	1	5811.23	1162.25	707.12	291.19	6518.35	1453.44
62	1	1	3	3	1	2	1	7219.62	1443.92	7166.08	2834.46	14385.7	4278.38
63	1	1	3	4	1	1	1	7771.37	1554.27	4167.6	871.97	11939	2426.24
64	1	1	3	2	1	1	2	7259.78	1395.11	2522.32	484.71	9782.1	1879.82
65	1	1	3	3	1	1	2	7228.05	1445.61	8864.82	2325.03	16092.9	3770.64
66	2	1	3	2	2	1	2	7000	1400	10688.2	5707.11	17688.2	7107.11
67	2	1	3	2	2	2	1	6482.23	1296.45	726	414.62	7208.23	1711.07
68	2	1	3	2	1	1	2	8000	1292.09	30023	4849.04	38023	6141.13
69	1	2	3	4	1	2	2	7941.3	0	2631.88	1156.45	10573.2	1156.45
70	2	1	3	2	1	2	1	5082.85	1016.57	4209.99	2502.55	9292.84	3519.12
71	1	1	3	2	1	1	2	7506.98	1501.4	6598	2676.16	14105	4177.56
72	2	1	3	3	2	2	2	7900	1580	2865.1	1676.46	10765.1	3256.46
73	1	1	3	1	1	2	2	8000	1600	4384	945.43	12384	2545.43
74	2	1	3	2	1	1	1	7996.97	1599.39	7701.5	4221.37	15698.5	5820.76
75	2	1	3	2	1	1	2	5254.34	1050.87	5404.18	3001.04	10658.5	4051.91
76	2	2	3	2	2	2	1	8000	1600	7173.57	4026.32	15173.6	5626.32
77	1	1	3	2	1	2	1	7943.1	1397.95	11330.2	1994.05	19273.3	3392
78	2	1	3	2	1	1	1	7582.86	1516.57	3949.97	2219.57	11532.8	3736.14
79	1	2	3	3	2	1	2	8391.27	1600	11297.3	3415.43	19688.5	5015.43
80	1	1	3	3	1	1	1	7531.52	1506.3	3159.52	1440.76	10691	2947.06
81	1	1	3	4	1	1	1	5981.57	1196.31	3968.55	2505.26	9950.12	3701.57
82	1	1	3	2	1	1	1	5138.83	1027.77	5432.04	2485.03	10570.9	3512.8
83	2	1	4	3	1	2	2	4423.25	884.65	15055.2	7915.49	19478.4	8800.14
84	2	1	4	2	1	1	2	5650.97	1130.19	8166.79	4573.86	13817.8	5704.05
85	2	2	4	2	1	1	1	6008.03	1201.61	3062.82	1686.09	9070.85	2887.7
86	1	1	4	3	1	1	1	4840.3	968.06	6388.18	2157.79	11228.5	3125.85
87	2	2	4	2	1	2	1	8430.48	1600	3243.72	1909.02	11674.2	3509.02
88	2	1	4	3	2	1	2	5732.71	644.88	900.01	101.24	6632.72	746.12
89	2	1	4	2	1	1	1	7029.62	1405.92	2864.99	1649.68	9894.61	3055.6
90	1	1	4	3	1	2	2	7838.01	1567.6	17276.4	3499.14	25114.4	5066.74
91	2	2	4	3	1	1	2	7505.63	1501.13	2769.05	1558.5	10274.7	3059.63
92	1	1	4	3	1	1	2	8133.12	1487.68	4090.7	748.25	12223.8	2235.93
93	2	1	4	3	1	2	2	8000	0	3718.17	430.08	11718.2	430.08
94	1	1	4	3	2	1	2	8000	1600	6445.19	1716.15	14445.2	3316.15
95	2	1	4	2	1	2	1	7231.81	1446.36	4948.87	2766.46	12180.7	4212.82
96	1	2	4	3	1	2	1	5663.15	1099.01	3600	698.63	9263.15	1797.64
97	1	1	4	3	1	1	2	3969.95	793.99	454.8	137.29	4424.75	931.28
98	1	2	4	3	1	2	2	7318.5	1425.08	10908	2124.04	18226.5	3549.12
99	2	1	4	2	2	2	2	1072.68	214.54	4034.19	2227.22	5106.87	2441.76
100	1	1	4	3	1	1	1	6429.81	1285.96	5154.95	1397.58	11584.8	2683.54
101	2	2	4	3	1	2	1	6896.32	1379.26	15031.3	7939.48	21927.7	9318.74
102	1	1	4	3	1	1	1	7931.95	1133.49	3545.53	506.66	11477.5	1640.15
103	1	1	4	3	1	2	2	11959.3	1600	3500.36	503.65	15459.7	2103.65
104	1	1	4	3	1	1	2	7000	968.52	14523.7	2009.5	21523.7	2978.02
105	1	1	4	1	1	1	2	7410.38	1482.08	4066.77	1585.71	11477.1	3067.79
106	2	1	4	2	1	1	1	7028.62	1405.72	1934.61	1125.66	8963.23	2531.38
107	1	1	4	3	1	1	1	6720.06	1344.01	2290.93	600.83	9010.99	1944.84
108	1	1	4	3	1	1	2	16221	1600	2775.14	700.97	18996.1	2300.97
109	2	1	4	2	2	1	2	8616.07	1600	8525.45	4591.36	17141.5	6191.36
110	1	2	4	3	1	1	1	6196.73	1239.35	2849.05	571.14	9045.78	1810.49
111	2	2	4	3	1	2	1	6351.65	1270.33	673.02	383.15	7024.67	1653.48
112	1	1	4	3	1	1	2	7851.43	746.62	2982.67	283.63	10834.1	1030.25
113	2	2	4	2	1	1	1	6215.8	1243.16	5612.24	3160.73	11828	4403.89
114	2	1	4	2	1	2	2	7954.84	1590.97	11576.8	6151.28	19531.6	7742.25
115	2	1	4	2	1	2	1	7627.87	1525.57	3880.64	2193.78	11508.5	3719.35
116	1	1	4	3	1	1	1	7863.36	1106.99	3285.58	462.54	11148.9	1569.53
117	1	1	4	3	2	1	2	8319.89	1600	3626.47	1163.16	11946.4	2763.16
118	2	1	4	2	2	1	2	7307.55	1461.51	2861.95	1546.27	10169.5	3007.78
119	2	1	4	2	2	2	2	7982.59	1596.52	5400.02	2945.54	13382.6	4542.06
120	2	1	4	2	1	1	2	3457.15	691.43	5791.61	3192.3	9248.76	3883.73
121	2	1	4	3	1	2	1	7253.4	1450.68	13303.8	7137.58	20557.2	8588.26
122	2	2	4	2	1	2	1	2821.09	564.22	3531.95	2054.09	6353.04	2618.31
123	1	1	4	3	1	1	1	8978.16	1600	2545.6	685.96	11523.8	2285.96
124	1	1	4	3	1	2	1	6000	1200	1955.12	790.67	7955.12	1990.67
125	2	1	4	3	1	1	1	7568.6	1513.72	5543.4	3133.92	13112	4647.64
126	1	2	4	3	1	2	1	7601.31	1185.41	1237.38	192.97	8838.69	1378.38
127	2	1	4	2	2	2	1	7885.84	1577.17	482	282.5	8367.84	1859.67
128	1	1	4	2	1	2	1	7682.11	1325.39	2959.99	510.69	10642.1	1836.08
129	1	1	4	3	2	2	2	7603.12	1283.25	8474.67	1430.35	16077.8	2713.6
130	1	2	4	3	1	1	1	4726.44	945.29	7097.73	2041.88	11824.2	2987.17
131	1	2	4	3	1	1	2	7382.89	1306.56	7867.35	1392.3	15250.2	2698.86
132	2	1	4	2	1	1	2	8000	1600	7963.9	4289.83	15963.9	5889.83
133	1	1	4	3	1	1	2	4114.45	539.54	7565.42	992.08	11679.9	1531.62
134	1	1	4	3	1	1	2	12525.6	1600	2851.39	401.95	15377	2001.95
135	2	1	4	2	1	1	2	7639.94	1527.99	4151	2387.33	11790.9	3915.32
136	2	1	4	2	1	1	2	6274.7	1254.94	5030.39	2838.63	11305.1	4093.57
137	2	1	4	2	2	2	1	7827.12	1565.42	3745.21	1598.81	11572.3	3164.23
138	2	1	4	2	1	2	1	6364.83	1272.97	2306.09	1282.46	8670.92	2555.43
139	2	1	4	2	1	1	1	7994.43	1598.89	8637.82	4576.78	16632.2	6175.67
140	2	1	4	2	1	2	1	5854.65	1170.93	1000.79	593.62	6855.44	1764.55
141	2	1	4	2	2	1	2	5868.43	1173.69	1520	916.07	7388.43	2089.76
	UEBMI:1	男1	<30:1	Mental labor:1	New cases:1	Native:1	Negative:1
	URBMI:2	女2	30~44:2	Manual labor:2	Relapsed cases:2	Migration:2	Positive:2
	Student:3		45~59:3	Retire:3
			60~:4	Unknown:4
